## CORRECTION

# Correction: Minor contributions of the maxillary sinus to the air-conditioning performance in macaque monkeys

Futoshi Mori, Sho Hanida, Kiyoshi Kumahata, Takako Miyabe-Nishiwaki, Juri Suzuki, Teruo Matsuzawa and Takeshi Nishimura

There was an error published in *Journal of Experimental Biology* (2015) **218**, 2394-2401 (doi:10.1242/jeb.118059).

The authors mistakenly transposed the citations of two references on p. 2400 in the Materials and Methods. The corrected text before equations 12 and 13 should read: ‘The resting tidal volume was estimated using Eqn 12 (Stahl, 1967)’ and ‘The resting respiratory rate was estimated using Eqn 13 (Worthington et al., 1991)’.

This error does not impact the results or conclusions of the article and the authors apologise to readers for any confusion caused. The pdf and HTML versions of the paper have been updated.
